# Supplementary material for: Centimeter-size square 2D layered Pb-free hybrid perovskite single crystal (CH3NH3)2MnCl4 for red photoluminescence
Source: Royal Society of Chemistry journal article supplement (doi:10.1039/c9ce00591a), 2019-01-01
Supplement: c9ce00591a1.pdf [file c9ce00591a1.pdf]

## **Centimeter-Size Square 2D Layered Pb-Free Hybrid Perovskite**

### **Single Crystal $(\text{CH}_3\text{NH}_3)_2\text{MnCl}_4$ for Red Photoluminescence**

Xiaohua Cheng<sup>1</sup>, Lin Jing<sup>1</sup>, Ye Yuan<sup>1</sup>, Songjie Du<sup>1</sup>,

Qing Yao<sup>1</sup>, Jie Zhang<sup>1</sup>, Jianxu Ding<sup>\*,1</sup>, Tianliang Zhou<sup>\*,2</sup>

1. College of Materials Science and Engineering, Shandong University of Science and Technology, Qingdao 266590, China;
2. College of Materials, Xiamen University, Xiamen 361005, China.

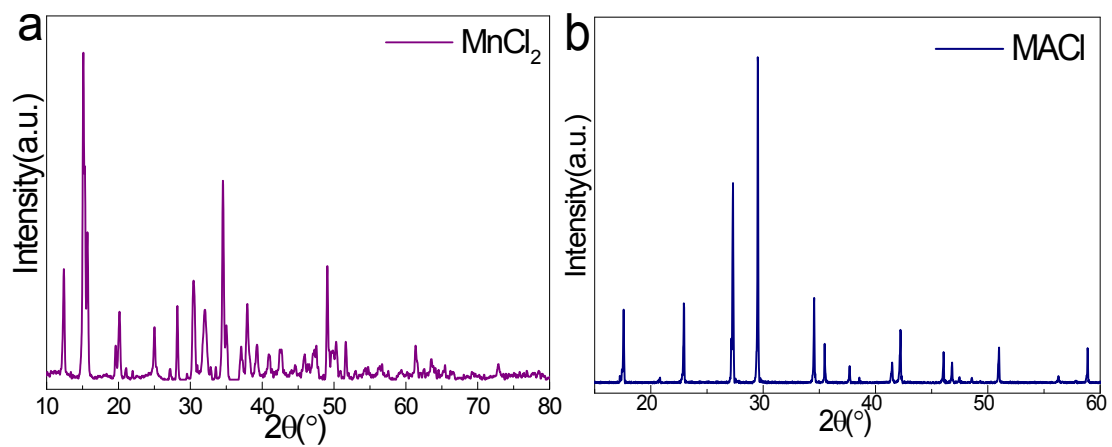

Figure S1 (a-b) the powder XRD patterns of MnCl<sub>2</sub> and MAcl as solute materials

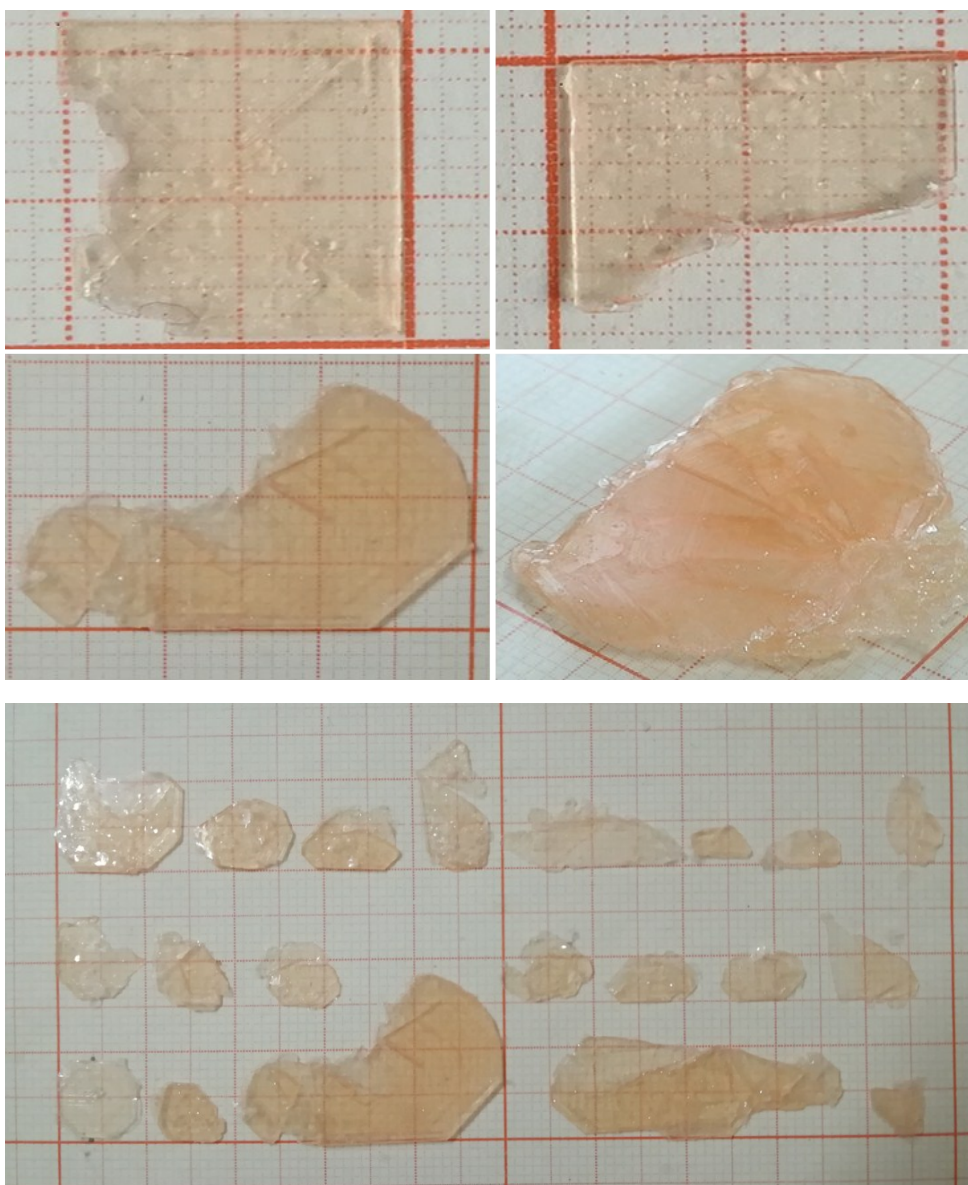

Figure S2 the photographs of  $(\text{CH}_3\text{NH}_3)_2\text{MnCl}_4$  single crystals in the progress of growing

All the crystal photographs exhibited in the Figure S2 manifested that  $(\text{CH}_3\text{NH}_3)_2\text{MnCl}_4$  single crystal grow in two-dimension along plane. During the  $(\text{CH}_3\text{NH}_3)_2\text{MnCl}_4$  single crystal growth process, some crystals with incomplete growth were exposed, showing crystal growth along axis  $a$  and  $b$ , which was consistent with the cell parameters.

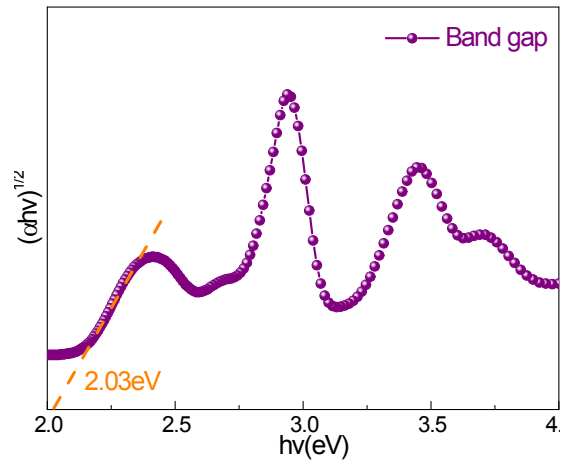

Figure S3 the optical band gap of  $(\text{CH}_3\text{NH}_3)_2\text{MnCl}_4$  single crystal
